# Supplementary material for: A Simple Preoperative Blood Count to Stratify Prognosis in Isocitrate Dehydrogenase-Wildtype Glioblastoma Patients Treated with Radiotherapy plus Concomitant and Adjuvant Temozolomide
Source: MDPI journal article supplement (doi:10.3390/cancers13225778), 2021-11-18
Supplement: s1 [file s1]

# A Simple Preoperative Blood Count to Stratify Prognosis in Isocitrate Dehydrogenase-Wildtype Glioblastoma Patients Treated with Radiotherapy Plus Concomitant and Adjuvant Temozolomide

Anne Clavreul, Jean-Michel Lemée, Gwénaëlle Soulard, Audrey Rousseau and Philippe Menei

**Table S1.** Relationship between hematological variables through Pearson's chi-squared test. Abbreviations: dNLR, derived neutrophil-to-lymphocyte ratio; LMR, lymphocyte-to-monocyte ratio; NLR, neutrophil-to-lymphocyte ratio; PLR, platelet-to-lymphocyte ratio; RBC, red blood cells; SII, systemic immune-inflammation index; SIRI, systemic inflammation response index; WBC, white blood cells.

|             | NLR         |         | dNLR        |         | Platelets   |       | RBC         |       |
|-------------|-------------|---------|-------------|---------|-------------|-------|-------------|-------|
|             | Pearson's r | P       | Pearson's r | P       | Pearson's r | P     | Pearson's r | P     |
| RBC         | 0.04        | 0.720   | 0.02        | 0.866   | -0.22       | 0.046 | 1.00        | /     |
| WBC         | 0.26        | 0.017   | 0.36        | < 0.001 | 0.20        | 0.062 | -0.12       | 0.260 |
| Neutrophils | 0.38        | < 0.001 | 0.39        | < 0.001 | 0.23        | 0.033 | -0.14       | 0.201 |
| Lymphocytes | -0.20       | 0.067   | -0.26       | 0.017   | 0.08        | 0.495 | -0.15       | 0.169 |
| Monocytes   | -0.09       | 0.401   | -0.13       | 0.225   | 0.16        | 0.146 | -0.06       | 0.598 |
| Platelets   | 0.05        | 0.654   | 0.08        | 0.489   | 1.00        | /     | -0.22       | 0.046 |
| NLR         | 1.00        | /       | 0.88        | < 0.001 | 0.05        | 0.654 | 0.04        | 0.720 |
| dNLR        | 0.88        | < 0.001 | 1.00        | /       | 0.08        | 0.489 | 0.02        | 0.866 |
| LMR         | -0.37       | < 0.001 | -0.38       | < 0.001 | -0.19       | 0.087 | -0.03       | 0.792 |
| PLR         | 0.30        | 0.005   | 0.36        | < 0.001 | 0.22        | 0.046 | 0.07        | 0.507 |
| SII         | 0.78        | < 0.001 | 0.67        | < 0.001 | 0.26        | 0.016 | 0.11        | 0.335 |
| SIRI        | 0.52        | < 0.001 | 0.49        | < 0.001 | 0.10        | 0.385 | -0.03       | 0.760 |
